# Supplementary material
Source: publisher site journal article supplement (https://www.dovepress.com/article/supplementary_file/616522/616522%20Supplementary%20Material.docx)
Supplement: Supplementary file 1 [file 616522%20Supplementary%20Material.docx]

Supplementary appendix 1

search from inception to February 9, 2026

pubmed:

((((random*[Title/Abstract]) OR (trial[Title/Abstract])) AND ((migraine without aura[Title/Abstract]) OR (MWoA[Title/Abstract]))) AND ((sham acupuncture[Title/Abstract]) OR (placebo acupuncture[Title/Abstract]))) AND (((acupuncture therapy[MeSH Terms]) OR (acupuncture[Title/Abstract])) OR (electroacupuncture[Title/Abstract]))

Scopus

TITLE-ABS-KEY(random* OR trial)

AND TITLE-ABS-KEY("migraine without aura" OR MWoA)

AND TITLE-ABS-KEY("sham acupuncture" OR "placebo acupuncture")

AND TITLE-ABS-KEY(acupuncture OR electroacupuncture)

Embase:

Search strategy: ('migraine without aura':ti,ab,kw OR MWoA:ti,ab,kw )

AND

(random*:ti,ab,kw OR trial:ti,ab,kw)

AND

('sham acupuncture':ti,ab,kw OR 'placebo acupuncture':ti,ab,kw)

AND

(acupuncture:ti,ab,kw OR electroacupuncture:ti,ab,kw)

Cochrone

Search strategy:

#1 ("migraine without aura"):ti,ab,kw

OR (MWoA):ti,ab,kw

#2 ("sham acupuncture"):ti,ab,kw

OR ("placebo acupuncture"):ti,ab,kw

#3 ("acupuncture"):ti,ab,kw

OR ("electroacupuncture"):ti,ab,kw

#4 #1 AND #2 AND #3

Web of Science

Search strategy:

TS=(random* OR trial)

AND TS=("migraine without aura" OR MWoA)

AND TS=("sham acupuncture" OR "placebo acupuncture")

AND TS=(acupuncture OR electroacupuncture)

wanfang

search:

**(acupuncture OR electroacupuncture OR needling)**
AND
**(randomized OR randomised OR randomized controlled OR random allocation)**
AND
**(sham acupuncture OR sham needling OR simulated acupuncture OR placebo acupuncture)**
AND
**(migraine without aura OR migraine)**

Supplementary Appendix 2

| **Section and Topic** | **Item #** | **Checklist item** | **Location where item is reported** |
| --- | --- | --- | --- |
| **TITLE** | | |  |
| Title | 1 | Identify the report as a systematic review. | 1 |
| **ABSTRACT** | | |  |
| Abstract | 2 | See the PRISMA 2020 for Abstracts checklist. | 1 |
| **INTRODUCTION** | | |  |
| Rationale | 3 | Describe the rationale for the review in the context of existing knowledge. | 2 |
| Objectives | 4 | Provide an explicit statement of the objective(s) or question(s) the review addresses. | 2 |
| **METHODS** | | |  |
| Eligibility criteria | 5 | Specify the inclusion and exclusion criteria for the review and how studies were grouped for the syntheses. | 3 |
| Information sources | 6 | Specify all databases, registers, websites, organisations, reference lists and other sources searched or consulted to identify studies. Specify the date when each source was last searched or consulted. | 3-4 |
| Search strategy | 7 | Present the full search strategies for all databases, registers and websites, including any filters and limits used. | 3-4 |
| Selection process | 8 | Specify the methods used to decide whether a study met the inclusion criteria of the review, including how many reviewers screened each record and each report retrieved, whether they worked independently, and if applicable, details of automation tools used in the process. | 4 |
| Data collection process | 9 | Specify the methods used to collect data from reports, including how many reviewers collected data from each report, whether they worked independently, any processes for obtaining or confirming data from study investigators, and if applicable, details of automation tools used in the process. | 4 |
| Data items | 10a | List and define all outcomes for which data were sought. Specify whether all results that were compatible with each outcome domain in each study were sought (e.g. for all measures, time points, analyses), and if not, the methods used to decide which results to collect. | 4 |
| 10b | List and define all other variables for which data were sought (e.g. participant and intervention characteristics, funding sources). Describe any assumptions made about any missing or unclear information. | 4 |
| Study risk of bias assessment | 11 | Specify the methods used to assess risk of bias in the included studies, including details of the tool(s) used, how many reviewers assessed each study and whether they worked independently, and if applicable, details of automation tools used in the process. | 4 |
| Effect measures | 12 | Specify for each outcome the effect measure(s) (e.g. risk ratio, mean difference) used in the synthesis or presentation of results. | 5 |
| Synthesis methods | 13a | Describe the processes used to decide which studies were eligible for each synthesis (e.g. tabulating the study intervention characteristics and comparing against the planned groups for each synthesis (item #5)). | 5 |
| 13b | Describe any methods required to prepare the data for presentation or synthesis, such as handling of missing summary statistics, or data conversions. | 5 |
| 13c | Describe any methods used to tabulate or visually display results of individual studies and syntheses. | 5 |
| 13d | Describe any methods used to synthesize results and provide a rationale for the choice(s). If meta-analysis was performed, describe the model(s), method(s) to identify the presence and extent of statistical heterogeneity, and software package(s) used. | 5 |
| 13e | Describe any methods used to explore possible causes of heterogeneity among study results (e.g. subgroup analysis, meta-regression). | 5 |
| 13f | Describe any sensitivity analyses conducted to assess robustness of the synthesized results. | 5 |
| Reporting bias assessment | 14 | Describe any methods used to assess risk of bias due to missing results in a synthesis (arising from reporting biases). | 6 |
| Certainty assessment | 15 | Describe any methods used to assess certainty (or confidence) in the body of evidence for an outcome. | 6 |
| **RESULTS** | | |  |
| Study selection | 16a | Describe the results of the search and selection process, from the number of records identified in the search to the number of studies included in the review, ideally using a flow diagram. | 6 |
| 16b | Cite studies that might appear to meet the inclusion criteria, but which were excluded, and explain why they were excluded. | 6 |
| Study characteristics | 17 | Cite each included study and present its characteristics. | 6,7 |
| Risk of bias in studies | 18 | Present assessments of risk of bias for each included study. | 7 |
| Results of individual studies | 19 | For all outcomes, present, for each study: (a) summary statistics for each group (where appropriate) and (b) an effect estimate and its precision (e.g. confidence/credible interval), ideally using structured tables or plots. | 7,8 |
| Results of syntheses | 20a | For each synthesis, briefly summarise the characteristics and risk of bias among contributing studies. | 7,8 |
| 20b | Present results of all statistical syntheses conducted. If meta-analysis was done, present for each the summary estimate and its precision (e.g. confidence/credible interval) and measures of statistical heterogeneity. If comparing groups, describe the direction of the effect. | 7,8 |
| 20c | Present results of all investigations of possible causes of heterogeneity among study results. | 7,8 |
| 20d | Present results of all sensitivity analyses conducted to assess the robustness of the synthesized results. | 7,8 |
| Reporting biases | 21 | Present assessments of risk of bias due to missing results (arising from reporting biases) for each synthesis assessed. | 7 |
| Certainty of evidence | 22 | Present assessments of certainty (or confidence) in the body of evidence for each outcome assessed. | 8 |
| **DISCUSSION** | | |  |
| Discussion | 23a | Provide a general interpretation of the results in the context of other evidence. | 8 |
| 23b | Discuss any limitations of the evidence included in the review. | 9 |
| 23c | Discuss any limitations of the review processes used. | 9 |
| 23d | Discuss implications of the results for practice, policy, and future research. | 9 |
| **OTHER INFORMATION** | | |  |
| Registration and protocol | 24a | Provide registration information for the review, including register name and registration number, or state that the review was not registered. | 2,3 |
| 24b | Indicate where the review protocol can be accessed, or state that a protocol was not prepared. | 2,3 |
| 24c | Describe and explain any amendments to information provided at registration or in the protocol. | NA |
| Support | 25 | Describe sources of financial or non-financial support for the review, and the role of the funders or sponsors in the review. | 9 |
| Competing interests | 26 | Declare any competing interests of review authors. | 9 |
| Availability of data, code and other materials | 27 | Report which of the following are publicly available and where they can be found: template data collection forms; data extracted from included studies; data used for all analyses; analytic code; any other materials used in the review. | 9 |

*From:*  Page MJ, McKenzie JE, Bossuyt PM, Boutron I, Hoffmann TC, Mulrow CD, et al. The PRISMA 2020 statement: an updated guideline for reporting systematic reviews. BMJ 2021;372:n71. doi: 10.1136/bmj.n71

Supplementary Appendix 3

| **Section/topic** | **#** |  | **Checklist item** | **Location(s) Reported** |
| --- | --- | --- | --- | --- |
| **INFORMATION SOURCES AND METHODS** | | | | |
| Database name | 1 |  | Name each individual database searched , stating the platform for each. | PubMed (MEDLINE), Embase, Web of Science Core Collection, Scopus, cochrone,WANFANG |
| Multi-database searching | 2 |  | If databases were searched simultaneously on a single platform , state the name of the platform , listing all of the databases searched. | Databases were searched individually. |
| Study registries | 3 |  | List any study registries searched. | No clinical trial registries were searched. |
| Online resources and browsing | 4 |  | Describe any online or print source purposefully searched or browsed (e.g., tables of contents, print conference proceedings, web sites), and how this was done. | To enhance completeness, reference lists of included studies and relevant review articles were manually examined. |
| Citation searching | 5 |  | Indicate whether cited references or citing references were examined , and describe any methods used for locating cited/citing references (e.g., browsing reference lists, using a citation index , setting up email alerts for references citing included studies). | Reference lists of included studies and relevant review articles were manually examined. |
| Contacts |  | 6 | Indicate whether additional studies or data were sought by contacting authors, experts, manufacturers, or oth | Not conducted |
| Other methods |  | 7 | Describe any additional information sources or search methods used. | No additional information sources or search methods were used. |
| SEARCH STRATEGIES |  |  |  |  |
| Full search strategies |  | 8 | Include the search strategies for each database and information source, copied and pasted exactly as run . | Supplementary Appendix 1 |
| Limits and restrictions |  | 9 | Specify that no limits were used, or describe any limits or restrictions applied to a search (e.g., date or time pe | No restrictions were applied to publication status or language . |
| Search filters |  | 10 | Indicate whether published search filters were used (as originally designed or modified), and if so, cite the filter | No restrictions were applied to publication status or language . |
| Prior work |  | 11 | Indicate when search strategies from other literature reviews were adapted or reused for a substantive part or | Not applicable |
| Updates |  | 12 | Report the methods used to update the search(es) (e.g., rerunning searches, email alerts). | searched to February 9, 2025 |
| Dates of searches |  | 13 | For each search strategy, provide the date when the last search occurred. | searched to February 9, 2025 |
| PEER REVIEW |  |  |  |  |
| Peer review |  | 14 | Describe any search peer review process. | no formal peer review of the search strategy was conducted. |
| MANAGING RECORDS |  |  |  |  |
| Total Records |  | 15 | Document the total number of records identified from each database and other information sources. | A total of 156 records were identified. |
| 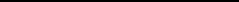Deduplication |  | 16 | Describe the processes and any software used to deduplicate records from multiple database searches and o After removal of 102 duplicate records, 54 records remained for title and abstract screening. | |

PRISMA-S: An Extension to the PRISMA Statement for Reporting Literature Searches in Systematic Reviews Rethlefsen ML , Kirtley S, Waffenschmidt S, Ayala AP, Moher D , Page MJ , Koffel JB, PRISMA-S Group.

Last updated February 27 , 2020.

supplementary table 1

| **Unique ID** | xu 2020 | **Study ID** | xu 2020 | **Assessor** | xuxu |
| --- | --- | --- | --- | --- | --- |
| **Ref or Label** | Manual acupuncture versus sham acupuncture and usual care for prophylaxis of episodic migraine without aura: Multicentre, randomised clinical trial | **Aim** | assignment to intervention (the 'intention-to-treat' effect) |  |  |
| **Experimental** | real acupuncture | **Comparator** | sham acupuncture | **Source** |  |
| **Outcome** | vas;hit-6 | **Results** |  | **Weight** | 1 |
| **Domain** | **Signalling question** | | | **Response** | **Comments** |
| **Bias arising from the randomization process** | 1.1 Was the allocation sequence random? | | | Y | After the baseline assessment, an independent investigator randomised eligible patients in a 2:2:1 ratio to receive manual acupuncture, sham acupuncture, or usual care. |
| 1.2 Was the allocation sequence concealed until participants were enrolled and assigned to interventions? | | | Y |
| 1.3 Did baseline differences between intervention groups suggest a problem with the randomization process? | | | N | Among 150 randomised patients (mean age 36.5 (SD 11.4) years; 123 (82%) women), 147 were included in the full analysis set |
| **Risk of bias judgement** | | | **Low** | The study used centralized randomization through an interactive web response system, allocation concealment was clearly reported, and no important baseline imbalances suggesting a failure of randomization were identified. Therefore, the risk of bias arising from the randomization process was judged as Low Risk |
| **Bias due to deviations from intended interventions** | 2.1.Were participants aware of their assigned intervention during the trial? | | | N | No significant difference was seen in the proportion of patients perceiving needle penetration between manual acupuncture and sham acupuncture (79% vs 75%; P=0.891) |
| 2.2.Were carers and people delivering the interventions aware of participants' assigned intervention during the trial? | | | Y |
| 2.3. If Y/PY/NI to 2.1 or 2.2: Were there deviations from the intended intervention that arose because of the experimental context? | | | N | No protocol deviations attributable to awareness of intervention assignment were reported. Both groups received identical treatment schedules and follow-up procedures. |
| 2.4 If Y/PY to 2.3: Were these deviations likely to have affected the outcome? | | | NA | Not applicable because no important deviations were identified. |
| 2.5. If Y/PY/NI to 2.4: Were these deviations from intended intervention balanced between groups? | | | NA | Not applicable. |
| 2.6 Was an appropriate analysis used to estimate the effect of assignment to intervention? | | | Y | Among 150 randomised patients...147 were included in the full analysis set |
| 2.7 If N/PN/NI to 2.6: Was there potential for a substantial impact (on the result) of the failure to analyse participants in the group to which they were randomized? | | | NA | Not applicable because an appropriate analysis was used. |
| **Risk of bias judgement** | | | **Low** | Participants were successfully blinded, no deviations from intended interventions were reported, and the analysis followed the intention-to-treat principle. Therefore, the risk of bias due to deviations from intended interventions was judged as low |
| **Bias due to missing outcome data** | 3.1 Were data for this outcome available for all, or nearly all, participants randomized? | | | Y | After randomisation, six (4%) patients were lost to follow-up. |
| 3.2 If N/PN/NI to 3.1: Is there evidence that result was not biased by missing outcome data? | | | Y | Three in the manual acupuncture group, one in the sham acupuncture group, and two in the usual care group. |
| 3.3 If N/PN to 3.2: Could missingness in the outcome depend on its true value? | | | PN | No evidence suggested outcome-dependent missingness. |
| 3.4 If Y/PY/NI to 3.3: Is it likely that missingness in the outcome depended on its true value? | | | PN |
| **Risk of bias judgement** | | | **Low** | Only 4% of participants were lost to follow-up, and losses were balanced across groups. Missing data were handled using LOCF. |
| **Bias in measurement of the outcome** | 4.1 Was the method of measuring the outcome inappropriate? | | | N | The primary outcomes were change in the mean number of migraine days and migraine attacks per four week cycle |
| 4.2 Could measurement or ascertainment of the outcome have differed between intervention groups? | | | PN | Independent research assistants supervised patients to complete their headache diaries. |
| 4.3 Were outcome assessors aware of the intervention received by study participants? | | | N | To maintain blinding in patients, outcome assessors, and statisticians, the allocation sequence was concealed until the end of the study. |
| 4.4 If Y/PY/NI to 4.3: Could assessment of the outcome have been influenced by knowledge of intervention received? | | | PY | The primary outcomes relied on patient-reported headache diaries. |
| 4.5 If Y/PY/NI to 4.4: Is it likely that assessment of the outcome was influenced by knowledge of intervention received? | | | PN |
| **Risk of bias judgement** | | | **Low** | Outcome assessors were blinded and blinding credibility was successfully maintained between manual and sham acupuncture groups. |
| **Bias in selection of the reported result** | 5.1 Were the data that produced this result analysed in accordance with a pre-specified analysis plan that was finalized before unblinded outcome data were available for analysis? | | | Y | The protocol and the statistical analysis plan are available in appendix 1. |
| 5.2 ... multiple eligible outcome measurements (e.g. scales, definitions, time points) within the outcome domain? | | | PN | The primary and secondary outcomes were clearly predefined in the protocol. |
| 5.3 ... multiple eligible analyses of the data? | | | PN | The statistical methods were prespecified in the published protocol and statistical analysis plan. |
| **Risk of bias judgement** | | | **Low** | The trial was prospectively registered and the statistical analysis plan was publicly available before outcome analysis. |
| **Overall bias** | **Risk of bias judgement** | | | **Some concerns** | The randomization process, missing outcome data, outcome measurement, and reporting domains were all judged as low risk. However, participants in the usual-care group and treatment providers were not blinded, resulting in some concerns regarding deviations from intended interventions. Therefore, the overall risk of bias was judged as Some Concerns. |
|  |  |  |  |  |  |
|  |  |  |  |  |  |
| **Unique ID** | zhao 2017 | **Study ID** | zhao 2017 | **Assessor** | xuxu |
| **Ref or Label** | The long-term effect of acupuncture for migraine prophylaxis a randomized clinical trial | **Aim** | assignment to intervention (the 'intention-to-treat' effect) |  |  |
| **Experimental** | real acupuncture | **Comparator** | sham acupuncture | **Source** |  |
| **Outcome** | vas;hit-6 | **Results** |  | **Weight** | 1 |
| **Domain** | **Signalling question** | | | **Response** | **Comments** |
| **Bias arising from the randomization process** | 1.1 Was the allocation sequence random? | | | Y | Participants were randomly assigned to true acupuncture, sham acupuncture, or a waiting-list control group |
| 1.2 Was the allocation sequence concealed until participants were enrolled and assigned to interventions? | | | Y |
| 1.3 Did baseline differences between intervention groups suggest a problem with the randomization process? | | | N | Baseline characteristics were comparable across the 3 groups. |
| **Risk of bias judgement** | | | **Low** | The study reported that participants were randomly assigned to the true acupuncture, sham acupuncture, and waiting-list groups. Baseline characteristics were comparable across all groups, and no evidence suggested problems in the randomization process. Therefore, the risk of bias arising from the randomization process was judged as low. |
| **Bias due to deviations from intended interventions** | 2.1.Were participants aware of their assigned intervention during the trial? | | | N | Participants in acupuncture and sham acupuncture groups were blinded. |
| 2.2.Were carers and people delivering the interventions aware of participants' assigned intervention during the trial? | | | Y |
| 2.3. If Y/PY/NI to 2.1 or 2.2: Were there deviations from the intended intervention that arose because of the experimental context? | | | N | No deviations due to awareness of intervention assignment were reported. |
| 2.4 If Y/PY to 2.3: Were these deviations likely to have affected the outcome? | | | NA | No deviations identified. |
| 2.5. If Y/PY/NI to 2.4: Were these deviations from intended intervention balanced between groups? | | | NA | No deviations identified. |
| 2.6 Was an appropriate analysis used to estimate the effect of assignment to intervention? | | | Y | Intention-to-treat analysis was performed. |
| 2.7 If N/PN/NI to 2.6: Was there potential for a substantial impact (on the result) of the failure to analyse participants in the group to which they were randomized? | | | NA | Appropriate analysis used. |
| **Risk of bias judgement** | | | **Low** | Although acupuncturists and waiting-list participants were not blinded, no important deviations from intended interventions were reported, and the analysis followed the ITT principle. |
| **Bias due to missing outcome data** | 3.1 Were data for this outcome available for all, or nearly all, participants randomized? | | | Y | 249 participants were randomized, and 245 were included in the ITT analysis. Only 4 were excluded, including 1 misdiagnosed participant and 3 with missing primary outcome. The study also reported a low loss-to-follow-up rate. |
| 3.2 If N/PN/NI to 3.1: Is there evidence that result was not biased by missing outcome data? | | | Y | Missing data were limited, and the article reported that missing data from participants who dropped out were replaced using the last observation carried forward method. |
| 3.3 If N/PN to 3.2: Could missingness in the outcome depend on its true value? | | | PN | Dropouts were few and reasons included dissatisfaction, time restriction, changed phone number, intercurrent illness, and unwillingness to follow up. These reasons do not clearly suggest missingness related to true outcome value. |
| 3.4 If Y/PY/NI to 3.3: Is it likely that missingness in the outcome depended on its true value? | | | PN |
| **Risk of bias judgement** | | | **Low** | Outcome data were available for nearly all randomized participants, missingness was minimal, and reasons for dropout were unlikely to bias the primary outcome. |
| **Bias in measurement of the outcome** | 4.1 Was the method of measuring the outcome inappropriate? | | | N | Participants used headache diaries to record migraine attacks, duration, severity using VAS, and rescue medication use. These are standard outcome measures for migraine trials. |
| 4.2 Could measurement or ascertainment of the outcome have differed between intervention groups? | | | PN | The same headache diary and follow-up procedures were used across groups. |
| 4.3 Were outcome assessors aware of the intervention received by study participants? | | | N | Outcome assessors, data collectors, and statisticians were blinded to treatment allocation. |
| 4.4 If Y/PY/NI to 4.3: Could assessment of the outcome have been influenced by knowledge of intervention received? | | | PN | Outcomes such as migraine frequency and pain intensity are subjective, but blinded assessors and standardized diary collection reduced this risk. |
| 4.5 If Y/PY/NI to 4.4: Is it likely that assessment of the outcome was influenced by knowledge of intervention received? | | | PN |
| **Risk of bias judgement** | | | **Low** | Outcome measurement was appropriate and standardized, headache diaries were used prospectively, and outcome assessors were blinded. |
| **Bias in selection of the reported result** | 5.1 Were the data that produced this result analysed in accordance with a pre-specified analysis plan that was finalized before unblinded outcome data were available for analysis? | | | Y | The article states: “The analysis plan was determined before the study was conducted.” The trial was also registered and had a previously published protocol |
| 5.2 ... multiple eligible outcome measurements (e.g. scales, definitions, time points) within the outcome domain? | | | PN | The primary outcome was clearly defined as change in migraine attack frequency from baseline to week 16. |
| 5.3 ... multiple eligible analyses of the data? | | | PN | The analysis approach was described in advance, including ANCOVA or Kruskal-Wallis depending on data distribution, with pairwise comparisons after global testing. |
| **Risk of bias judgement** | | | **Low** | The trial was registered, the protocol was available, the analysis plan was prespecified, and the primary outcome was clearly reported. |
| **Overall bias** | **Risk of bias judgement** | | | **Low** | Zhao 2017 used central randomization, comparable baseline groups, blinded outcome assessment, ITT analysis, minimal missing outcome data, standardized outcome measurement, and a prespecified analysis plan. Therefore, the overall risk of bias was judged as Low Risk. |
|  |  |  |  |  |  |
|  |  |  |  |  |  |
| **Unique ID** | sun 2025 | **Study ID** | sun 2025 | **Assessor** | xuxu |
| **Ref or Label** | The Prophylactic Effect of Acupuncture for Migraine Without Aura: A Randomized, Sham-Controlled, Clinical Trial | **Aim** | assignment to intervention (the 'intention-to-treat' effect) |  |  |
| **Experimental** | real acupuncture | **Comparator** | sham acupuncture | **Source** |  |
| **Outcome** | vas | **Results** |  | **Weight** | 1 |
| **Domain** | **Signalling question** | | | **Response** | **Comments** |
| **Bias arising from the randomization process** | 1.1 Was the allocation sequence random? | | | Y | 192 migraineurs without aura were randomized 1:1 to 12 sessions of MPA or NPA |
| 1.2 Was the allocation sequence concealed until participants were enrolled and assigned to interventions? | | | PY |
| 1.3 Did baseline differences between intervention groups suggest a problem with the randomization process? | | | N | No evidence of baseline imbalance reported. |
| **Risk of bias judgement** | | | **Some concerns** | The study reported that participants were randomized in a 1:1 ratio to manual penetrating acupuncture or non-penetrating acupuncture. However, details regarding sequence generation and allocation concealment were not clearly described in the available report. Although no baseline imbalance was reported, insufficient information prevented confirmation that the randomization process was adequately concealed. Therefore, some concerns were assigned. |
| **Bias due to deviations from intended interventions** | 2.1.Were participants aware of their assigned intervention during the trial? | | | PN | Participants were blinded using the Park sham acupuncture device. However, the credibility assessment demonstrated partial unblinding at study completion. |
| 2.2.Were carers and people delivering the interventions aware of participants' assigned intervention during the trial? | | | Y |
| 2.3. If Y/PY/NI to 2.1 or 2.2: Were there deviations from the intended intervention that arose because of the experimental context? | | | N | No evidence of protocol deviations caused by knowledge of intervention assignment was reported. Treatment schedules were standardized. |
| 2.4 If Y/PY to 2.3: Were these deviations likely to have affected the outcome? | | | NA |  |
| 2.5. If Y/PY/NI to 2.4: Were these deviations from intended intervention balanced between groups? | | | NA |  |
| 2.6 Was an appropriate analysis used to estimate the effect of assignment to intervention? | | | Y | Intent-to-treat (ITT) analyses were conducted." Multiple imputation was used for missing data. |
| 2.7 If N/PN/NI to 2.6: Was there potential for a substantial impact (on the result) of the failure to analyse participants in the group to which they were randomized? | | | N | All randomized participants were included in the ITT population. Multiple imputation was applied. |
| **Risk of bias judgement** | | | **Low** | Although acupuncturists were not blinded, participant blinding was attempted, no important deviations were identified, and a proper ITT analysis with multiple imputation was performed. |
| **Bias due to missing outcome data** | 3.1 Were data for this outcome available for all, or nearly all, participants randomized? | | | N | Eighteen participants (9.1%) dropped out during follow-up. Five withdrawals occurred in the MPA group and thirteen in the NPA group. |
| 3.2 If N/PN/NI to 3.1: Is there evidence that result was not biased by missing outcome data? | | | Y | The authors performed ITT analysis and applied multiple imputation for missing outcome data. |
| 3.3 If N/PN to 3.2: Could missingness in the outcome depend on its true value? | | | PY | Some participants discontinued because they were "not satisfied with the efficacy. |
| 3.4 If Y/PY/NI to 3.3: Is it likely that missingness in the outcome depended on its true value? | | | PN |
| **Risk of bias judgement** | | | **Low** | Although some dropouts may have been related to treatment response, missing data were handled appropriately using ITT analysis and multiple imputation. |
| **Bias in measurement of the outcome** | 4.1 Was the method of measuring the outcome inappropriate? | | | N | Validated migraine outcomes were used, including migraine frequency, migraine days, VAS, HIT-6, MSQ, and medication use. |
| 4.2 Could measurement or ascertainment of the outcome have differed between intervention groups? | | | N | The same assessment procedures were applied in both groups. |
| 4.3 Were outcome assessors aware of the intervention received by study participants? | | | N | Outcome assessors, data collectors, and statisticians were blinded to the treatment allocation. |
| 4.4 If Y/PY/NI to 4.3: Could assessment of the outcome have been influenced by knowledge of intervention received? | | | N | Outcome assessors were blinded. |
| 4.5 If Y/PY/NI to 4.4: Is it likely that assessment of the outcome was influenced by knowledge of intervention received? | | | N |
| **Risk of bias judgement** | | | **Low** | Validated outcome measures and blinded assessment procedures minimized measurement bias. |
| **Bias in selection of the reported result** | 5.1 Were the data that produced this result analysed in accordance with a pre-specified analysis plan that was finalized before unblinded outcome data were available for analysis? | | | PY | The trial was prospectively registered (ChiCTR2000032308). However, the manuscript states that the primary outcome was modified during the study after discussion by the research team. |
| 5.2 ... multiple eligible outcome measurements (e.g. scales, definitions, time points) within the outcome domain? | | | PY | Numerous migraine-related outcomes, quality-of-life outcomes, and biomarker outcomes were measured. |
| 5.3 ... multiple eligible analyses of the data? | | | PY | Both ITT and PPS analyses were performed and multiple outcome time points were analyzed. |
| **Risk of bias judgement** | | | **Some concerns** | The study modified the primary outcome after trial initiation, creating some concern regarding selective reporting, despite prospective registration. |
| **Overall bias** | **Risk of bias judgement** | | | **Some concerns** | Excellent randomization and allocation concealment.Appropriate blinding of participants, assessors, data collectors, and statisticians.ITT analysis with multiple imputation.Low attrition rate.The only important issue is that the primary outcome was modified during the trial. |
|  |  |  |  |  |  |
|  |  |  |  |  |  |
| **Unique ID** | xie 2025 | **Study ID** | xie 2025 | **Assessor** | xuxu |
| **Ref or Label** | Multi-Spatial Voxel-Scale Modulation of Acupuncture on Abnormal Brain Activity in Migraine Patients Without Aura: A Randomized Study Neuroimaging Trial | **Aim** | assignment to intervention (the 'intention-to-treat' effect) |  |  |
| **Experimental** | real acupuncture | **Comparator** | sham acupuncture | **Source** |  |
| **Outcome** | vas;hit-6 | **Results** |  | **Weight** | 1 |
| **Domain** | **Signalling question** | | | **Response** | **Comments** |
| **Bias arising from the randomization process** | 1.1 Was the allocation sequence random? | | | Y | A total of 64 patients with MwoA were randomized into true acupuncture (TA) and sham acupuncture (SA) groups. |
| 1.2 Was the allocation sequence concealed until participants were enrolled and assigned to interventions? | | | PY |
| 1.3 Did baseline differences between intervention groups suggest a problem with the randomization process? | | | N | No baseline imbalance reported |
| **Risk of bias judgement** | | | **Some concerns** | The study stated that 64 patients with migraine without aura were randomized into true acupuncture and sham acupuncture groups. However, the report did not provide sufficient details regarding allocation concealment or sequence generation. No baseline imbalances suggesting failed randomization were reported. Therefore, the risk of bias arising from the randomization process was judged as some concerns. |
| **Bias due to deviations from intended interventions** | 2.1.Were participants aware of their assigned intervention during the trial? | | | N | Participants were blinded. Sham acupuncture was delivered using the Park Sham Device and did not penetrate the skin. |
| 2.2.Were carers and people delivering the interventions aware of participants' assigned intervention during the trial? | | | Y |
| 2.3. If Y/PY/NI to 2.1 or 2.2: Were there deviations from the intended intervention that arose because of the experimental context? | | | N | No protocol deviations attributable to lack of provider blinding were reported. Treatment schedules were standardized across groups. |
| 2.4 If Y/PY to 2.3: Were these deviations likely to have affected the outcome? | | | NA |  |
| 2.5. If Y/PY/NI to 2.4: Were these deviations from intended intervention balanced between groups? | | | NA |  |
| 2.6 Was an appropriate analysis used to estimate the effect of assignment to intervention? | | | PN | Analyses were performed on participants completing treatment and imaging assessments. An explicit intention-to-treat analysis was not reported. |
| 2.7 If N/PN/NI to 2.6: Was there potential for a substantial impact (on the result) of the failure to analyse participants in the group to which they were randomized? | | | PY | Several randomized participants were excluded from imaging analyses because of excessive head movement, incomplete image conversion, or withdrawal. |
| **Risk of bias judgement** | | | **Some concerns** | Participant blinding was appropriate, but ITT analysis was not clearly described and post-randomization exclusions occurred. |
| **Bias due to missing outcome data** | 3.1 Were data for this outcome available for all, or nearly all, participants randomized? | | | N | Sixty-four participants were randomized, but only 62 were included in clinical analyses and 56 in imaging analyses. |
| 3.2 If N/PN/NI to 3.1: Is there evidence that result was not biased by missing outcome data? | | | PN | No sensitivity analysis for missing data was reported. |
| 3.3 If N/PN to 3.2: Could missingness in the outcome depend on its true value? | | | PY | Two participants withdrew because of unsatisfactory efficacy, suggesting that missingness may have been related to outcomes. |
| 3.4 If Y/PY/NI to 3.3: Is it likely that missingness in the outcome depended on its true value? | | | PY |
| **Risk of bias judgement** | | | **High** | Missing outcome data occurred after randomization, including withdrawals due to unsatisfactory efficacy, and no formal methods were used to address potential bias. |
| **Bias in measurement of the outcome** | 4.1 Was the method of measuring the outcome inappropriate? | | | N | Outcomes were measured using validated instruments including migraine frequency, VAS, HIT-6, MSQ and standardized rs-fMRI parameters. |
| 4.2 Could measurement or ascertainment of the outcome have differed between intervention groups? | | | N | Identical assessment procedures were used in both groups. |
| 4.3 Were outcome assessors aware of the intervention received by study participants? | | | N | Clinical evaluators were separated from treatment providers and were not involved in acupuncture delivery. The study implemented separation of researchers, operators, and statisticians. |
| 4.4 If Y/PY/NI to 4.3: Could assessment of the outcome have been influenced by knowledge of intervention received? | | | N | Blinded assessors and objective imaging outcomes minimized this possibility. |
| 4.5 If Y/PY/NI to 4.4: Is it likely that assessment of the outcome was influenced by knowledge of intervention received? | | | N |
| **Risk of bias judgement** | | | **Low** | Outcomes were measured using validated methods and assessors were effectively blinded. |
| **Bias in selection of the reported result** | 5.1 Were the data that produced this result analysed in accordance with a pre-specified analysis plan that was finalized before unblinded outcome data were available for analysis? | | | NI | The trial was prospectively registered (ChiCTR2000032308), but no detailed statistical analysis plan was provided. |
| 5.2 ... multiple eligible outcome measurements (e.g. scales, definitions, time points) within the outcome domain? | | | PY | Multiple imaging outcomes (ALFF, fALFF, ReHo, DC) and multiple clinical outcomes were assessed. |
| 5.3 ... multiple eligible analyses of the data? | | | PY | Numerous voxel-wise analyses, subgroup analyses, and correlation analyses were conducted. |
| **Risk of bias judgement** | | | **Some concerns** | Multiple outcomes and analytical approaches were available, while a prespecified statistical analysis plan was not reported. |
| **Overall bias** | **Risk of bias judgement** | | | **High** | Randomization appeared appropriate but allocation concealment was unclear. |
|  |  |  |  |  |  |
|  |  |  |  |  |  |
| **Unique ID** | liu 2023 | **Study ID** | liu 2023 | **Assessor** | xuxu |
| **Ref or Label** | Circulating exosomal microRNA profiles in migraine patients receiving acupuncture treatment: A placebo-controlled clinical trial | **Aim** | assignment to intervention (the 'intention-to-treat' effect) |  |  |
| **Experimental** | real acupuncture | **Comparator** | sham acupuncture | **Source** |  |
| **Outcome** | vas | **Results** |  | **Weight** | 1 |
| **Domain** | **Signalling question** | | | **Response** | **Comments** |
| **Bias arising from the randomization process** | 1.1 Was the allocation sequence random? | | | Y | We isolated serum exosomes from patients with MWoA before and after true and sham acupuncture treatment." Placebo-controlled clinical trial. |
| 1.2 Was the allocation sequence concealed until participants were enrolled and assigned to interventions? | | | PY |
| 1.3 Did baseline differences between intervention groups suggest a problem with the randomization process? | | | N | No baseline imbalance reported. |
| **Risk of bias judgement** | | | **Some concerns** | The study described allocation to true acupuncture and sham acupuncture groups, indicating a randomized design. However, the methods used to generate the random sequence and conceal allocation were not sufficiently reported. No important baseline differences were identified. Because key information on the randomization process was unavailable, the risk of bias was judged as some concerns. |
| **Bias due to deviations from intended interventions** | 2.1.Were participants aware of their assigned intervention during the trial? | | | N | Participants received either true acupuncture or sham acupuncture according to a placebo-controlled design. Sham acupuncture was used specifically to maintain participant blinding. |
| 2.2.Were carers and people delivering the interventions aware of participants' assigned intervention during the trial? | | | Y |
| 2.3. If Y/PY/NI to 2.1 or 2.2: Were there deviations from the intended intervention that arose because of the experimental context? | | | N | No important protocol deviations were reported. Both groups received identical treatment schedules (three sessions weekly for four weeks). |
| 2.4 If Y/PY to 2.3: Were these deviations likely to have affected the outcome? | | | NA |  |
| 2.5. If Y/PY/NI to 2.4: Were these deviations from intended intervention balanced between groups? | | | NA |  |
| 2.6 Was an appropriate analysis used to estimate the effect of assignment to intervention? | | | PN | The study primarily analyzed participants completing treatment and outcome assessments. Intention-to-treat analysis was not explicitly reported. |
| 2.7 If N/PN/NI to 2.6: Was there potential for a substantial impact (on the result) of the failure to analyse participants in the group to which they were randomized? | | | PY | Exclusion of participants after enrollment could potentially affect estimated treatment effects. |
| **Risk of bias judgement** | | | **Low** | Blinding procedures were generally appropriate, but ITT analysis was not clearly reported. |
| **Bias due to missing outcome data** | 3.1 Were data for this outcome available for all, or nearly all, participants randomized? | | | N | Sixty-three MWoA patients were recruited, three were excluded, and sixty were randomized. Outcome analyses were conducted on the randomized cohort, but only subsets were included for serum and sequencing analyses. The manuscript does not clearly demonstrate complete outcome availability for all randomized participants. |
| 3.2 If N/PN/NI to 3.1: Is there evidence that result was not biased by missing outcome data? | | | PN | No sensitivity analysis or formal missing-data analysis was reported. |
| 3.3 If N/PN to 3.2: Could missingness in the outcome depend on its true value? | | | PY | Information regarding reasons for all exclusions and missing outcomes after randomization was limited. |
| 3.4 If Y/PY/NI to 3.3: Is it likely that missingness in the outcome depended on its true value? | | | PN |
| **Risk of bias judgement** | | | **Some concerns** | Missing-data handling was insufficiently described and no sensitivity analyses were reported. |
| **Bias in measurement of the outcome** | 4.1 Was the method of measuring the outcome inappropriate? | | | N | Outcomes were measured using validated migraine instruments including VAS, HIT-6, MSQ, attack frequency, attack duration, and time unable to work/study/perform housework. |
| 4.2 Could measurement or ascertainment of the outcome have differed between intervention groups? | | | N | The same outcome measures and assessment procedures were used in both groups. |
| 4.3 Were outcome assessors aware of the intervention received by study participants? | | | PN | Although assessor blinding was not explicitly detailed, outcome measures were collected using standardized questionnaires and headache records. |
| 4.4 If Y/PY/NI to 4.3: Could assessment of the outcome have been influenced by knowledge of intervention received? | | | PN | Some outcomes were self-reported, but participant blinding through sham acupuncture reduced this risk. |
| 4.5 If Y/PY/NI to 4.4: Is it likely that assessment of the outcome was influenced by knowledge of intervention received? | | | PN |
| **Risk of bias judgement** | | | **Low** | Validated outcome measures were used and participant blinding minimized measurement bias. |
| **Bias in selection of the reported result** | 5.1 Were the data that produced this result analysed in accordance with a pre-specified analysis plan that was finalized before unblinded outcome data were available for analysis? | | | NI | The study was prospectively registered (ChiCTR2000034417), but a detailed statistical analysis plan was not reported. |
| 5.2 ... multiple eligible outcome measurements (e.g. scales, definitions, time points) within the outcome domain? | | | PY | Multiple clinical outcomes, miRNA outcomes, sequencing outcomes, and biomarker analyses were assessed. |
| 5.3 ... multiple eligible analyses of the data? | | | PY | Multiple bioinformatic analyses, differential expression analyses, machine-learning analyses, and correlation analyses were conducted. |
| **Risk of bias judgement** | | | **Some concerns** | The study involved numerous candidate biomarkers and analytical approaches, while prespecified analysis details were not fully described. |
| **Overall bias** | **Risk of bias judgement** | | | **Some concerns** | Randomization appeared appropriate and baseline balance was achieved.Outcome measurement methods were valid and participant blinding was maintained.However, allocation concealment details were limited.Missing-data handling and ITT analysis were not clearly reported.Multiple biomarker analyses were conducted without a clearly documented prespecified analysis plan. |
|  |  |  |  |  |  |
|  |  |  |  |  |  |
| **Unique ID** | liu 2022 | **Study ID** | liu 2022 | **Assessor** | xuxu |
| **Ref or Label** | Changes in brain connectivity linked to multisensory processing of pain modulation in migraine with acupuncture treatment | **Aim** | assignment to intervention (the 'intention-to-treat' effect) |  |  |
| **Experimental** | real acupuncture | **Comparator** | sham acupuncture | **Source** |  |
| **Outcome** | vas | **Results** |  | **Weight** | 1 |
| **Domain** | **Signalling question** | | | **Response** | **Comments** |
| **Bias arising from the randomization process** | 1.1 Was the allocation sequence random? | | | Y | MWoA patients were recruited and randomly assigned to 4 weeks of real or sham acupuncture. |
| 1.2 Was the allocation sequence concealed until participants were enrolled and assigned to interventions? | | | PY |
| 1.3 Did baseline differences between intervention groups suggest a problem with the randomization process? | | | N | No indication of baseline imbalance. |
| **Risk of bias judgement** | | | **Some concerns** | Participants were reported to have been randomly assigned to real acupuncture and sham acupuncture groups. Nevertheless, the procedures used for allocation concealment were not clearly described in the available manuscript. Although baseline characteristics appeared balanced, insufficient reporting of the randomization process resulted in some concerns regarding bias arising from randomization. |
| **Bias due to deviations from intended interventions** | 2.1.Were participants aware of their assigned intervention during the trial? | | | N | Patients received treatment in separate acupuncture rooms to avoid communication between groups, and participants were blinded to group allocation. |
| 2.2.Were carers and people delivering the interventions aware of participants' assigned intervention during the trial? | | | Y |
| 2.3. If Y/PY/NI to 2.1 or 2.2: Were there deviations from the intended intervention that arose because of the experimental context? | | | N | No deviations due to awareness of allocation were reported. Both groups received 12 acupuncture sessions over 4 weeks, and patients were not allowed prophylactic medications. |
| 2.4 If Y/PY to 2.3: Were these deviations likely to have affected the outcome? | | | NA | Not applicable because no important deviations were reported. |
| 2.5. If Y/PY/NI to 2.4: Were these deviations from intended intervention balanced between groups? | | | NA | Not applicable. |
| 2.6 Was an appropriate analysis used to estimate the effect of assignment to intervention? | | | PN | The analysis included 40 participants who completed post-treatment clinical assessments and MRI sessions, rather than all randomized patients. The paper does not clearly state that an intention-to-treat analysis was performed. |
| 2.7 If N/PN/NI to 2.6: Was there potential for a substantial impact (on the result) of the failure to analyse participants in the group to which they were randomized? | | | PY | Because only participants completing treatment and post-treatment assessment were analyzed, exclusion after randomization could potentially influence the estimated intervention effect. |
| **Risk of bias judgement** | | | **Some concerns** | Participants were blinded and no deviations were reported, but the analysis did not clearly follow an ITT approach and included only participants with complete post-treatment data. |
| **Bias due to missing outcome data** | 3.1 Were data for this outcome available for all, or nearly all, participants randomized? | | | N | Sixty-four patients were enrolled; 12 dropped out before baseline MRI, 10 dropped out before first acupuncture treatment, and 2 more did not complete treatment. Finally, 40 participants were included in the final analysis. |
| 3.2 If N/PN/NI to 3.1: Is there evidence that result was not biased by missing outcome data? | | | PN | Reasons for dropout were reported, including lack of interest, worry about MRI scans, time restriction, fear of acupuncture, lack of adherence, and dissatisfaction with treatment. However, no sensitivity analysis for missing outcome data was reported. |
| 3.3 If N/PN to 3.2: Could missingness in the outcome depend on its true value? | | | PY | Missingness could be related to treatment experience because one participant in the real acupuncture group dropped out due to lack of adherence and one in the sham group dropped out due to dissatisfaction with treatment. |
| 3.4 If Y/PY/NI to 3.3: Is it likely that missingness in the outcome depended on its true value? | | | PN |
| **Risk of bias judgement** | | | **Some concerns** | A substantial number of initially enrolled participants were not included in the final analysis, and the analysis was based on completers. Although reasons for dropout were reported, missing data handling and sensitivity analyses were not clearly described. |
| **Bias in measurement of the outcome** | 4.1 Was the method of measuring the outcome inappropriate? | | | N | The study used standard migraine outcomes including monthly migraine days, VAS, HIT-6, MSQ, BDI-II, BAI, PSQI, and MoCA. Headache diaries recorded attack frequency, duration, days, pain intensity, symptoms, and acute medication use. |
| 4.2 Could measurement or ascertainment of the outcome have differed between intervention groups? | | | PN | The same clinical outcome measures and MRI procedures were applied to both real and sham acupuncture groups. |
| 4.3 Were outcome assessors aware of the intervention received by study participants? | | | N | Outcome assessors, the fMRI scanner, and statisticians were blinded to group allocation throughout the trial |
| 4.4 If Y/PY/NI to 4.3: Could assessment of the outcome have been influenced by knowledge of intervention received? | | | PN | Some outcomes were subjective, such as VAS and headache diary outcomes, but assessor blinding and standardized outcome collection reduced this risk. |
| 4.5 If Y/PY/NI to 4.4: Is it likely that assessment of the outcome was influenced by knowledge of intervention received? | | | PN |
| **Risk of bias judgement** | | | **Low** | Outcome measurement was appropriate, standardized across groups, and outcome assessors were blinded. |
| **Bias in selection of the reported result** | 5.1 Were the data that produced this result analysed in accordance with a pre-specified analysis plan that was finalized before unblinded outcome data were available for analysis? | | | NI | The manuscript describes the statistical analysis methods in detail, but it does not clearly report a prespecified statistical analysis plan or trial registration for this specific study. |
| 5.2 ... multiple eligible outcome measurements (e.g. scales, definitions, time points) within the outcome domain? | | | PY | The study assessed multiple clinical outcomes, including MMDs, VAS, HIT-6, MSQ, BDI-II, BAI, PSQI, MoCA, and multiple neuroimaging connectivity outcomes. |
| 5.3 ... multiple eligible analyses of the data? | | | PY | Multiple fMRI seed regions, connectivity analyses, interaction effects, post-hoc tests, and clinical correlation analyses were performed, which could allow multiple eligible analytical choices. |
| **Risk of bias judgement** | | | **Some concerns** | Although the methods and analyses were described, the manuscript did not clearly indicate a prespecified analysis plan for the reported outcomes, and multiple clinical and neuroimaging outcomes were assessed. |
| **Overall bias** | **Risk of bias judgement** | | | **Some concerns** | The randomization process and outcome measurement were generally appropriate, but the study analyzed only completers, had notable exclusions before final analysis, and did not clearly report a prespecified analysis plan. Therefore, the overall risk of bias was judged as Some Concerns. |
|  |  |  |  |  |  |
|  |  |  |  |  |  |
| **Unique ID** | wang 2019 | **Study ID** | wang 2019 | **Assessor** | xuxu |
| **Ref or Label** | A Randomized Controlled Trial of Balance Acupuncture Therapy for Migraine Without Aura | **Aim** | assignment to intervention (the 'intention-to-treat' effect) |  |  |
| **Experimental** | real acupuncture | **Comparator** | sham acupuncture | **Source** |  |
| **Outcome** | vas | **Results** |  | **Weight** | 1 |
| **Domain** | **Signalling question** | | | **Response** | **Comments** |
| **Bias arising from the randomization process** | 1.1 Was the allocation sequence random? | | | PY | divided into two groups according to random allocation principle |
| 1.2 Was the allocation sequence concealed until participants were enrolled and assigned to interventions? | | | PY |
| 1.3 Did baseline differences between intervention groups suggest a problem with the randomization process? | | | NI | Baseline characteristics described but randomization details insufficient. |
| **Risk of bias judgement** | | | **High** | The study only reported that participants were divided into two groups according to a “random allocation principle” without describing the method used to generate the allocation sequence or whether allocation was concealed. Insufficient reporting of the randomization procedure raises concerns regarding potential selection bias. Therefore, the risk of bias arising from the randomization process was judged as high. |
| **Bias due to deviations from intended interventions** | 2.1.Were participants aware of their assigned intervention during the trial? | | | Y | Participants received either the true headache acupoint or a sham point located at a different anatomical location. No participant blinding procedure was reported. |
| 2.2.Were carers and people delivering the interventions aware of participants' assigned intervention during the trial? | | | Y |
| 2.3. If Y/PY/NI to 2.1 or 2.2: Were there deviations from the intended intervention that arose because of the experimental context? | | | PY | Lack of participant and practitioner blinding could have influenced treatment expectations and behavior. No information was provided regarding protocol adherence. |
| 2.4 If Y/PY to 2.3: Were these deviations likely to have affected the outcome? | | | PY | Outcomes such as headache duration, attack frequency, and pain scores were subjective and could be influenced by participants’ expectations. |
| 2.5. If Y/PY/NI to 2.4: Were these deviations from intended intervention balanced between groups? | | | NI | Insufficient information was provided to determine whether any deviations were balanced between groups |
| 2.6 Was an appropriate analysis used to estimate the effect of assignment to intervention? | | | NI | No intention-to-treat analysis or statistical handling of protocol deviations was reported. |
| 2.7 If N/PN/NI to 2.6: Was there potential for a substantial impact (on the result) of the failure to analyse participants in the group to which they were randomized? | | | PY | The analysis strategy was insufficiently described and no ITT approach was reported. |
| **Risk of bias judgement** | | | **High** | Neither participants nor practitioners were blinded, subjective outcomes were used, and no ITT analysis was reported. |
| **Bias due to missing outcome data** | 3.1 Were data for this outcome available for all, or nearly all, participants randomized? | | | Y | Forty-two participants were enrolled and analyzed (21 per group). No losses to follow-up or withdrawals were reported. |
| 3.2 If N/PN/NI to 3.1: Is there evidence that result was not biased by missing outcome data? | | | Y | Outcome data were reported for all randomized participants. |
| 3.3 If N/PN to 3.2: Could missingness in the outcome depend on its true value? | | | N | No missing outcome data were reported. |
| 3.4 If Y/PY/NI to 3.3: Is it likely that missingness in the outcome depended on its true value? | | | N |
| **Risk of bias judgement** | | | **Low** | No missing outcome data or participant attrition were reported. |
| **Bias in measurement of the outcome** | 4.1 Was the method of measuring the outcome inappropriate? | | | N | Headache duration, monthly headache frequency, and pain intensity (VAS) are standard outcome measures for migraine studies. |
| 4.2 Could measurement or ascertainment of the outcome have differed between intervention groups? | | | PY | Outcome assessment procedures were not fully described. |
| 4.3 Were outcome assessors aware of the intervention received by study participants? | | | Y | No assessor blinding was reported |
| 4.4 If Y/PY/NI to 4.3: Could assessment of the outcome have been influenced by knowledge of intervention received? | | | Y | Pain scores and headache-related outcomes were patient-reported and subjective. |
| 4.5 If Y/PY/NI to 4.4: Is it likely that assessment of the outcome was influenced by knowledge of intervention received? | | | PY |
| **Risk of bias judgement** | | | **Some concerns** | Outcome measures were appropriate, but the lack of assessor blinding and reliance on subjective outcomes create potential measurement bias. |
| **Bias in selection of the reported result** | 5.1 Were the data that produced this result analysed in accordance with a pre-specified analysis plan that was finalized before unblinded outcome data were available for analysis? | | | NI | No trial registration, protocol, or prespecified statistical analysis plan was reported. |
| 5.2 ... multiple eligible outcome measurements (e.g. scales, definitions, time points) within the outcome domain? | | | PN | The study reported the outcomes described in the Methods section. |
| 5.3 ... multiple eligible analyses of the data? | | | NI | Insufficient information was available regarding alternative analytical approaches. |
| **Risk of bias judgement** | | | **Some concerns** | No protocol or trial registration was available to verify selective reporting. |
| **Overall bias** | **Risk of bias judgement** | | | **High** | Randomization procedures were inadequately reported; Allocation concealment was not described;Participant and practitioner blinding were absent. |
|  |  |  |  |  |  |
|  |  |  |  |  |  |
| **Unique ID** | zhang 2026 | **Study ID** | zhang 2026 | **Assessor** | xuxu |
| **Ref or Label** | Acupuncture for Migraine Without Aura and Connection-Based Efficacy Prediction: A Randomized Clinical Trial | **Aim** | assignment to intervention (the 'intention-to-treat' effect) |  |  |
| **Experimental** | real acupuncture | **Comparator** | sham acupuncture | **Source** |  |
| **Outcome** | HIT-6 | **Results** |  | **Weight** | 1 |
| **Domain** | **Signalling question** | | | **Response** | **Comments** |
| **Bias arising from the randomization process** | 1.1 Was the allocation sequence random? | | | Y | Eligible participants were randomly assigned to receive real acupuncture or sham acupuncture." |
| 1.2 Was the allocation sequence concealed until participants were enrolled and assigned to interventions? | | | PY |
| 1.3 Did baseline differences between intervention groups suggest a problem with the randomization process? | | | N | Groups: 60 vs 60; no imbalance reported. |
| **Risk of bias judgement** | | | **Low** | The study was a randomized clinical trial in which eligible participants were randomly assigned to real acupuncture or sham acupuncture groups. Equal allocation was achieved, and no baseline imbalances indicating a problem with randomization were reported. Given the rigorous reporting standards of randomized clinical trials and the absence of evidence suggesting deficiencies in sequence generation or allocation concealment, the risk of bias arising from the randomization process was judged as low. |
| **Bias due to deviations from intended interventions** | 2.1.Were participants aware of their assigned intervention during the trial? | | | N | Participants, outcome assessors, and statistical analysts were blinded to the group assignments |
| 2.2.Were carers and people delivering the interventions aware of participants' assigned intervention during the trial? | | | Y |
| 2.3. If Y/PY/NI to 2.1 or 2.2: Were there deviations from the intended intervention that arose because of the experimental context? | | | N | Both groups received standardized treatment schedules and procedures. No evidence of systematic deviations was reported. |
| 2.4 If Y/PY to 2.3: Were these deviations likely to have affected the outcome? | | | NA |  |
| 2.5. If Y/PY/NI to 2.4: Were these deviations from intended intervention balanced between groups? | | | NA |  |
| 2.6 Was an appropriate analysis used to estimate the effect of assignment to intervention? | | | Y | Primary and secondary outcomes were analyzed using intention-to-treat and per-protocol sets. |
| 2.7 If N/PN/NI to 2.6: Was there potential for a substantial impact (on the result) of the failure to analyse participants in the group to which they were randomized? | | | N |  |
| **Risk of bias judgement** | | | **Low** | Participants remained blinded, interventions were standardized, and intention-to-treat analysis was performed. Any lack of blinding among acupuncturists is unlikely to have materially affected results. |
| **Bias due to missing outcome data** | 3.1 Were data for this outcome available for all, or nearly all, participants randomized? | | | Y | 120 randomized; only 6 participants discontinued after randomization. Per-protocol completion was 59/60 and 55/60 respectively. |
| 3.2 If N/PN/NI to 3.1: Is there evidence that result was not biased by missing outcome data? | | | Y | The statistical data were derived from 10 imputed datasets. |
| 3.3 If N/PN to 3.2: Could missingness in the outcome depend on its true value? | | | PN | time conflicts or doubts about treatment efficacy |
| 3.4 If Y/PY/NI to 3.3: Is it likely that missingness in the outcome depended on its true value? | | | N |
| **Risk of bias judgement** | | | **Low** | Outcome completeness exceeded 95%, and multiple imputation was used. Missing data were unlikely to meaningfully influence the results. |
| **Bias in measurement of the outcome** | 4.1 Was the method of measuring the outcome inappropriate? | | | N | All instruments were validated. |
| 4.2 Could measurement or ascertainment of the outcome have differed between intervention groups? | | | N | Both groups used identical headache diaries and assessment procedures. |
| 4.3 Were outcome assessors aware of the intervention received by study participants? | | | N | Outcome assessors … were blinded to the group assignments. |
| 4.4 If Y/PY/NI to 4.3: Could assessment of the outcome have been influenced by knowledge of intervention received? | | | NA |  |
| 4.5 If Y/PY/NI to 4.4: Is it likely that assessment of the outcome was influenced by knowledge of intervention received? | | | NA |
| **Risk of bias judgement** | | | **Low** | Outcome assessors were blinded and validated measurement tools were used equally across groups. |
| **Bias in selection of the reported result** | 5.1 Were the data that produced this result analysed in accordance with a pre-specified analysis plan that was finalized before unblinded outcome data were available for analysis? | | | Y | The statistical analysis plan and study protocol are available in Supplement 1 and Supplement 2. |
| 5.2 ... multiple eligible outcome measurements (e.g. scales, definitions, time points) within the outcome domain? | | | N | The outcomes were clearly prespecified. |
| 5.3 ... multiple eligible analyses of the data? | | | NI | The analytical methods were prespecified and consistently reported. |
| **Risk of bias judgement** | | | **Low** | The protocol and SAP were available before analysis, and no evidence of selective outcome reporting was identified. |
| **Overall bias** | **Risk of bias judgement** | | | **Low** | This was a well-conducted randomized controlled trial with adequate randomization and allocation concealment, successful participant and assessor blinding, very low attrition, intention-to-treat analysis, prespecified outcomes, and publicly available protocol/statistical analysis plan. No domain raised sufficient concerns to downgrade the overall risk of bias. |
